# Supplementary material for: Assessment of physical activity and its facilitators and barriers among Syrian refugees living in Amman City, Jordan: a cross-sectional study
Source: Springer Nature journal article supplement (doi:10.1186/s12889-022-14064-1), 2022-09-12
Supplement: MOESM1 [file 23478360]

Appendix3: Questionnaire

**Questionnaire**

|                                    |              |             |
|------------------------------------|--------------|-------------|
|                                    |              | <b>code</b> |
| <b>Location</b>                    | 1.Amman city |             |
| <b>No of list</b>                  |              |             |
| <b>Date</b>                        | / / 2017     |             |
| <b>Name of research assistance</b> |              |             |

**1.Basic Demographics Characteristics**

| No  | Question                                                   | Response                                                                                                                                                                                                                                             | Code |
|-----|------------------------------------------------------------|------------------------------------------------------------------------------------------------------------------------------------------------------------------------------------------------------------------------------------------------------|------|
| 1-1 | What sex are you?                                          | 1. Male<br>2. Female                                                                                                                                                                                                                                 |      |
| 1-2 | How old are you?                                           | _____ years old                                                                                                                                                                                                                                      |      |
| 1-3 | What is your occupation now?                               | 1. Student<br>2. Housewife<br>3. Craftman<br>4. employee<br>5. Agriculture<br>6. Other<br>7. Retired<br>8. Not working<br>0. Prefer not to answer                                                                                                    |      |
| 1-4 | What is the highest level of education you have completed? | 1. No formal schooling<br>2. Less than primary school<br>3. Primary school completed<br>4. Secondary school completed<br><del>5. High school completed</del><br>5. College/University completed<br>6. Postgraduate degree<br>0. Prefer not to answer |      |
| 1-5 | What is your marital status?                               | 1. Single<br>2. Married<br>3. divorced                                                                                                                                                                                                               |      |

|            |                                                                  |                                            |  |
|------------|------------------------------------------------------------------|--------------------------------------------|--|
|            |                                                                  | 4. No longer married                       |  |
| <b>1-6</b> | How many in your family?<br>(include yourself)                   | _____ member(s)                            |  |
| <b>1-7</b> | Are you living with others<br>who needs care from others<br>now? | 1. Yes<br>2. No<br>0. Prefer not to answer |  |

## 2. Characteristics as a refugee in Jordan

| No         | Question                                | Response                                                                                                                                                                | code |
|------------|-----------------------------------------|-------------------------------------------------------------------------------------------------------------------------------------------------------------------------|------|
| <b>2-1</b> | Where in Syria are you<br>from?         | 1. Homs<br>2. Aleppo<br>3. Damascus<br>4. Hamah<br>5. Dara'a<br>6. Idlib<br>7. Latakiya<br>8. Other<br>0. Prefer not to answer                                          |      |
| <b>2-2</b> | What was your<br>occupation in Syria?   | 1. Student<br>2. Housewife<br>3. Professional/semi professional<br>4. employee<br>5. Agriculture<br>6. Other<br>7. Retired<br>8. Not working<br>0. Prefer not to answer |      |
| <b>2-3</b> | What is a reason you<br>come to Jordan? | 1. Because you feel the danger<br>2. Because of your medical condition<br>3. Because there are relatives in<br>Jordan<br>4. Other<br>0. Prefer not to answer            |      |
| <b>2-4</b> | How long have you<br>been in Jordan?    | 1. 0-6 months<br>2. 6-12 months                                                                                                                                         |      |

|            |                                                              |                                                                                                                                                                                                                 |  |
|------------|--------------------------------------------------------------|-----------------------------------------------------------------------------------------------------------------------------------------------------------------------------------------------------------------|--|
|            |                                                              | <p>3. more than 1 year and less than 2 years</p> <p>4. more than 2 years and less than 3 years</p> <p>5. more than 3 years and less than 4 years</p> <p>6. more than 4 years</p> <p>0. Prefer not to answer</p> |  |
| <b>2-5</b> | Are you currently registered with UNHCR?                     | <p>1. Yes, I am registered with UNHCR</p> <p>2. NO, I am not registered with UNHCR</p> <p>3. I am waiting for completion of register</p> <p>0. Prefer not to answer</p>                                         |  |
| <b>2-6</b> | Do you obtain a service card by Jordan ministry of Interior? | <p>1. Yes, I have a service card</p> <p>2. No, I do not have a service card</p> <p>0. Prefer not to answer</p>                                                                                                  |  |

### 3. Physical condition

| No         | Question                                                                                   | Response                                                  | code |
|------------|--------------------------------------------------------------------------------------------|-----------------------------------------------------------|------|
| <b>3-1</b> | Would you consider your health condition “under control” right now?                        | <p>1. Yes</p> <p>2. No</p> <p>0. Prefer not to answer</p> |      |
| <b>3-2</b> | How do you think about your level of physical activity?                                    | <p>1. High</p> <p>2. Moderate</p> <p>3. Low</p>           |      |
| <b>3-3</b> | Have you diagnosed as hypertension?                                                        | <p>1. Yes</p> <p>2. No</p> <p>0. Prefer not to answer</p> |      |
| <b>3-4</b> | Have you diagnosed as obesity?                                                             | <p>1. Yes</p> <p>2. No</p> <p>0. Prefer not to answer</p> |      |
| <b>3-5</b> | Do you currently smoke any tobacco products, such as algeere, cigarettes, cigars or pipes? | <p>1. Yes</p> <p>2. No</p> <p>0. Prefer not to answer</p> |      |

#### 4. Mental condition

| No  | Question                                            | Response                                                 | code |
|-----|-----------------------------------------------------|----------------------------------------------------------|------|
| 4-1 | Are you satisfied with current situation in Jordan? | 1. Yes<br>2. No<br>0. Prefer not to answer               |      |
| 4-2 | Do you feel stress after coming to Jordan?          | 1. Yes<br>2. Neutral<br>3. No<br>0. Prefer not to answer |      |

#### 5. Facilitators and Barriers to physical activity

| No  | Question                                                                                    | Response                                                                                                                                                                                                                                                                                                                                                                                                                                            | code |
|-----|---------------------------------------------------------------------------------------------|-----------------------------------------------------------------------------------------------------------------------------------------------------------------------------------------------------------------------------------------------------------------------------------------------------------------------------------------------------------------------------------------------------------------------------------------------------|------|
| 5-1 | Which are benefits for you to do physical activity?<br><br>*could be multiple answer        | 1. Promote and maintain health<br>2. Improve body image and shape<br>3. Improve muscle power<br>4. Spent free times<br>5. Weight control/obesity prevention<br>6. Psychological wellbeing<br>7. Recreation<br>8. Prevent diseases<br>9. Improve mentality and intellectuality<br>10. Companionship with others<br>11. Socializing<br>12. Fun and enjoyment<br>13. Improve sleeping<br>14. Self-dependence<br>15. Relieve tension<br>16. No benefits |      |
| 5-2 | Which is the most barrier for you to do physical activity?<br><br>*could be multiple answer | 1. Time limitations<br>2. Lack of accessible and suitable sports places<br>3. Lack of safe sports places<br>4. Lack of support and encouragement from others<br>5. Lack of friends to encourage me<br>6. Have other important priorities                                                                                                                                                                                                            |      |

|            |                                                                                                                           |                                                                                                                                                                                                                                                                                                                                                                                                                                                                                                                                                                                                                                                                                                                                                                                                                                                                                                            |  |
|------------|---------------------------------------------------------------------------------------------------------------------------|------------------------------------------------------------------------------------------------------------------------------------------------------------------------------------------------------------------------------------------------------------------------------------------------------------------------------------------------------------------------------------------------------------------------------------------------------------------------------------------------------------------------------------------------------------------------------------------------------------------------------------------------------------------------------------------------------------------------------------------------------------------------------------------------------------------------------------------------------------------------------------------------------------|--|
|            |                                                                                                                           | <ul style="list-style-type: none"> <li>7. Lack of sports programs that suit my physical fitness</li> <li>8. Not interested in sports</li> <li>9. Lack of motivation</li> <li>10. High cost</li> <li>11. Lack of sports skills</li> <li>12. Fear of failure in sports competition</li> <li>13. Fear of injury</li> <li>14. Fear of deterioration of physical illness</li> <li>15. Nobody to care for my family</li> <li>16. Feeling tired on physical activity</li> <li>17. Ignorance about benefits of sports</li> <li>18. Prefer not to attend sports place</li> <li>19. Lack of or low physical power</li> <li>20. Feeling unable to practice sports adequately</li> <li>21. Objection of others</li> <li>22. Body cannot tolerate physical activity</li> <li>23. Unsuitable (hot or cold) weather</li> <li>24. Previous bad experience with physical sport activity</li> <li>25. No barriers</li> </ul> |  |
| <b>5-3</b> | <p>Would you consider the amount of your physical activity in Jordan increase/decrease, comparing with that of Syria?</p> | <ul style="list-style-type: none"> <li>1. the amount of physical activity increased in Jordan than in Syria</li> <li>2. the amount of physical activity decreased in Jordan than in Syria</li> <li>3. the amount of physical activity not change</li> <li>4. Not sure</li> </ul>                                                                                                                                                                                                                                                                                                                                                                                                                                                                                                                                                                                                                           |  |
